# Supplementary material for: Dewetting Process of Silver Thin Films and Its Application on Percolative Pressure Sensors with High Sensitivity
Source: MDPI journal article supplement (doi:10.3390/polym15010180), 2022-12-30
Supplement: s1 [file s1]

# Dewetting Process of Silver Thin Films and Its Application on Percolative Pressure Sensors with High Sensitivity

Chia-Yu Cho, Jui-Chen Chang, Min-Xian Cai, Pei-Ting Lin and Yao-Joe Yang \*

The analytical model of the central deflection for a circular membrane with clamped edge under a uniformly distributed load [38] is shown in Equation S1. This analytical model can be used to approximately estimate the force-deformation relationship of the membrane of the proposed sensors. The schematic of the membrane is shown in Figure S1.

$$d = \frac{pr^4}{64D} \quad (S1)$$

where  $d$  is the central deflection of the membrane,  $D$  is the flexural rigidity,  $r$  is the membrane radius, and  $p$  is the uniformly distributed load.

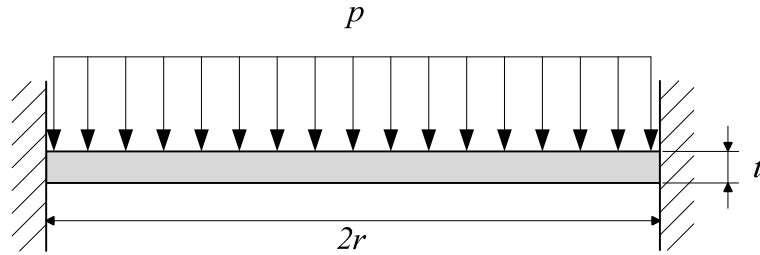

**Figure S1.** The cross-sectional schematic of a circular membrane with clamped edge under a uniformly distributed load.

According to Equation S1, the central deflection is proportional to  $r^4$ . Therefore, the average strain of the membrane is proportional to  $r^3$  (i.e.,  $d/r$ ). Since the sensor response is proportional to the strain, the sensor response is also proportional to  $r^3$ . Therefore, under the same distributed load  $p$ , the device with a larger membrane diameter gives larger sensor response than the device with a smaller membrane diameter. Consequently, the device with a larger membrane diameter possesses a larger sensitivity. This brief modeling will be added in the supplementary material.

## References

- [38] S. Timoshenko and S. Woinowsky-Krieger, Theory of plates and shells. McGraw-hill New York, 1959; pp. 51-58.
